# Supplementary material for: Assessment of the Prediction Power of Forced Ageing Methodology on Lager Beer Aldehyde Evolution during Maritime Transportation
Source: MDPI journal article supplement (doi:10.3390/molecules28104201), 2023-05-19
Supplement: s1 [file s1]

## Supplementary material

**Table S1:** Detailed quantification results of the 12 aldehydes (three samples per batch) in maritime transport simulation and forced ageing (7, 21, and 28 days) samples. Concentration is expressed as mean value  $\pm$  standard deviation.

| Compound                                    | Batch | Transport & Storage simulation   | 7 days                           | 21 days                           | 28 days                           |
|---------------------------------------------|-------|----------------------------------|----------------------------------|-----------------------------------|-----------------------------------|
| <b>Strecker degradation aldehydes</b>       |       |                                  |                                  |                                   |                                   |
| Phenylacetaldehyde ( $\mu\text{g/L}$ )      | 1     | 178.31 $\pm$ 8.13 <sup>A</sup>   | 169.72 $\pm$ 9.87 <sup>A,B</sup> | 161.69 $\pm$ 11.15 <sup>B</sup>   | 163.26 $\pm$ 8.31 <sup>B</sup>    |
|                                             | 2     | 168.46 $\pm$ 7.91 <sup>A</sup>   | 169.47 $\pm$ 11.00 <sup>A</sup>  | 155.28 $\pm$ 5.98 <sup>B</sup>    | 162.11 $\pm$ 6.70 <sup>A,B</sup>  |
|                                             | 3     | 170.38 $\pm$ 11.20 <sup>A</sup>  | 155.63 $\pm$ 13.18 <sup>B</sup>  | 156.88 $\pm$ 8.03 <sup>A,B</sup>  | 165.31 $\pm$ 11.52 <sup>A,B</sup> |
|                                             | 4     | 161.28 $\pm$ 7.74 <sup>A,B</sup> | 153.39 $\pm$ 10.96 <sup>B</sup>  | 159.21 $\pm$ 7.53 <sup>B</sup>    | 171.20 $\pm$ 9.29 <sup>A</sup>    |
|                                             | 5     | 166.21 $\pm$ 9.37 <sup>A,B</sup> | 150.64 $\pm$ 19.28 <sup>B</sup>  | 167.07 $\pm$ 16.20 <sup>A,B</sup> | 169.85 $\pm$ 6.97 <sup>A</sup>    |
| Benzaldehyde ( $\mu\text{g/L}$ )            | 1     | 6.29 $\pm$ 0.31 <sup>A</sup>     | 5.75 $\pm$ 0.30 <sup>B</sup>     | 5.26 $\pm$ 0.21 <sup>C</sup>      | 5.28 $\pm$ 0.41 <sup>C</sup>      |
|                                             | 2     | 6.30 $\pm$ 0.33 <sup>A</sup>     | 5.83 $\pm$ 0.37 <sup>B</sup>     | 5.01 $\pm$ 0.22 <sup>C</sup>      | 5.40 $\pm$ 0.22 <sup>D</sup>      |
|                                             | 3     | 6.64 $\pm$ 0.52 <sup>A</sup>     | 4.93 $\pm$ 0.20 <sup>B</sup>     | 5.41 $\pm$ 0.32 <sup>C</sup>      | 5.37 $\pm$ 0.19 <sup>C</sup>      |
|                                             | 4     | 6.47 $\pm$ 0.32 <sup>A</sup>     | 5.14 $\pm$ 0.19 <sup>B</sup>     | 5.69 $\pm$ 0.42 <sup>C</sup>      | 5.38 $\pm$ 0.46 <sup>B,C</sup>    |
|                                             | 5     | 6.10 $\pm$ 0.58 <sup>A</sup>     | 4.85 $\pm$ 0.26 <sup>B</sup>     | 5.42 $\pm$ 0.51 <sup>C</sup>      | 5.47 $\pm$ 0.16 <sup>C</sup>      |
| 2-methylpropanal ( $\mu\text{g/L}$ )        | 1     | 8.67 $\pm$ 1.38 <sup>A,B</sup>   | 10.37 $\pm$ 1.16 <sup>A</sup>    | 8.43 $\pm$ 1.24 <sup>B</sup>      | 6.52 $\pm$ 0.68 <sup>C</sup>      |
|                                             | 2     | 4.03 $\pm$ 0.58 <sup>A</sup>     | 12.94 $\pm$ 1.22 <sup>B</sup>    | 11.38 $\pm$ 1.36 <sup>B,C</sup>   | 10.12 $\pm$ 1.19 <sup>C</sup>     |
|                                             | 3     | 3.01 $\pm$ 0.57 <sup>A</sup>     | 5.15 $\pm$ 0.50 <sup>B</sup>     | 11.85 $\pm$ 0.75 <sup>C</sup>     | 8.00 $\pm$ 0.87 <sup>D</sup>      |
|                                             | 4     | 3.74 $\pm$ 0.41 <sup>A</sup>     | 4.93 $\pm$ 0.51 <sup>A,B</sup>   | 11.68 $\pm$ 1.15 <sup>C</sup>     | 5.51 $\pm$ 1.61 <sup>B</sup>      |
|                                             | 5     | 3.21 $\pm$ 0.41 <sup>A</sup>     | 3.68 $\pm$ 0.52 <sup>A</sup>     | 12.72 $\pm$ 1.16 <sup>B</sup>     | 7.92 $\pm$ 0.80 <sup>C</sup>      |
| 2-methylbutanal ( $\mu\text{g/L}$ )         | 1     | nd                               | nd                               | nd                                | nd                                |
|                                             | 2     | nd                               | nd                               | nd                                | nd                                |
|                                             | 3     | nd                               | nd                               | nd                                | nd                                |
|                                             | 4     | nd                               | nd                               | nd                                | nd                                |
|                                             | 5     | nd                               | nd                               | nd                                | nd                                |
| 3-methylbutanal ( $\mu\text{g/L}$ )         | 1     | 5.10 $\pm$ 1.15 <sup>A</sup>     | 4.82 $\pm$ 0.55 <sup>A</sup>     | 4.59 $\pm$ 0.55 <sup>A</sup>      | 5.51 $\pm$ 0.62 <sup>A</sup>      |
|                                             | 2     | 5.89 $\pm$ 0.45 <sup>A</sup>     | 5.09 $\pm$ 5.79 <sup>B,C</sup>   | 5.50 $\pm$ 0.57 <sup>A,B</sup>    | 4.55 $\pm$ 0.34 <sup>C</sup>      |
|                                             | 3     | 3.74 $\pm$ 0.59 <sup>A</sup>     | 4.45 $\pm$ 0.35 <sup>A</sup>     | 5.35 $\pm$ 0.68 <sup>B</sup>      | 4.37 $\pm$ 0.46 <sup>A</sup>      |
|                                             | 4     | 5.07 $\pm$ 0.52 <sup>A</sup>     | 4.12 $\pm$ 0.52 <sup>B</sup>     | 5.38 $\pm$ 0.63 <sup>A</sup>      | 4.67 $\pm$ 0.74 <sup>A,B</sup>    |
|                                             | 5     | 5.24 $\pm$ 0.67 <sup>A</sup>     | 3.73 $\pm$ 0.51 <sup>B</sup>     | 5.53 $\pm$ 0.59 <sup>A</sup>      | 5.15 $\pm$ 0.54 <sup>A</sup>      |
| <b>Lipid oxidation aldehydes</b>            |       |                                  |                                  |                                   |                                   |
| Hexanal ( $\mu\text{g/L}$ )                 | 1     | 1.29 $\pm$ 0.17 <sup>A</sup>     | 1.20 $\pm$ 0.42 <sup>A</sup>     | 0.96 $\pm$ 0.19 <sup>A</sup>      | 0.95 $\pm$ 0.14 <sup>A</sup>      |
|                                             | 2     | 1.67 $\pm$ 0.18 <sup>A</sup>     | 1.91 $\pm$ 0.19 <sup>A,B</sup>   | 2.07 $\pm$ 0.24 <sup>B</sup>      | 1.87 $\pm$ 0.26 <sup>A,B</sup>    |
|                                             | 3     | 1.41 $\pm$ 0.15 <sup>A</sup>     | nq                               | 1.57 $\pm$ 0.19 <sup>A</sup>      | 1.34 $\pm$ 0.17 <sup>A</sup>      |
|                                             | 4     | 1.24 $\pm$ 0.07 <sup>A</sup>     | 0.71 $\pm$ 0.17 <sup>B</sup>     | 1.40 $\pm$ 0.18 <sup>A</sup>      | 0.91 $\pm$ 0.19 <sup>B</sup>      |
|                                             | 5     | 1.08 $\pm$ 0.15 <sup>A</sup>     | nq                               | 1.64 $\pm$ 0.07 <sup>B</sup>      | 1.14 $\pm$ 0.10 <sup>A</sup>      |
| Heptanal ( $\mu\text{g/L}$ )                | 1     | nd                               | nd                               | nd                                | nd                                |
|                                             | 2     | nd                               | nd                               | nd                                | nd                                |
|                                             | 3     | nd                               | nd                               | nd                                | nd                                |
|                                             | 4     | nd                               | nd                               | nd                                | nd                                |
|                                             | 5     | nd                               | nd                               | nd                                | nd                                |
| Nonanal ( $\mu\text{g/L}$ )                 | 1     | 1.92 $\pm$ 0.43 <sup>A,B</sup>   | 2.55 $\pm$ 0.17 <sup>C</sup>     | 1.74 $\pm$ 0.20 <sup>B</sup>      | 2.25 $\pm$ 0.28 <sup>A,C</sup>    |
|                                             | 2     | 2.83 $\pm$ 0.32 <sup>A</sup>     | 2.23 $\pm$ 0.27 <sup>B</sup>     | 2.60 $\pm$ 0.33 <sup>A,B</sup>    | 2.57 $\pm$ 0.37 <sup>A,B</sup>    |
|                                             | 3     | nq                               | 2.68 $\pm$ 0.28 <sup>A</sup>     | 2.08 $\pm$ 0.16 <sup>B</sup>      | nq                                |
|                                             | 4     | nq                               | 4.78 $\pm$ 0.39 <sup>A</sup>     | 2.01 $\pm$ 0.23 <sup>B</sup>      | nq                                |
|                                             | 5     | nq                               | 2.06 $\pm$ 0.13 <sup>A</sup>     | 1.93 $\pm$ 0.20 <sup>A</sup>      | 1.81 $\pm$ 0.25 <sup>A</sup>      |
| <i>Trans</i> -2-nonenal ( $\mu\text{g/L}$ ) | 1     | 0.45 $\pm$ 0.14 <sup>A</sup>     | 0.98 $\pm$ 0.15 <sup>B</sup>     | 0.71 $\pm$ 0.14 <sup>C</sup>      | 0.52 $\pm$ 0.10 <sup>A</sup>      |
|                                             | 2     | 0.41 $\pm$ 0.06 <sup>A</sup>     | 1.38 $\pm$ 0.15 <sup>B</sup>     | 0.94 $\pm$ 0.17 <sup>C</sup>      | 0.72 $\pm$ 0.09 <sup>D</sup>      |
|                                             | 3     | 0.54 $\pm$ 0.06 <sup>A</sup>     | 0.79 $\pm$ 0.15 <sup>B</sup>     | 1.51 $\pm$ 0.08 <sup>C</sup>      | 1.13 $\pm$ 0.11 <sup>D</sup>      |
|                                             | 4     | 0.54 $\pm$ 0.05 <sup>A</sup>     | 1.13 $\pm$ 0.15 <sup>B</sup>     | 1.46 $\pm$ 0.22 <sup>C</sup>      | 0.82 $\pm$ 0.18 <sup>D</sup>      |
|                                             | 5     | 0.45 $\pm$ 0.04 <sup>A</sup>     | 0.78 $\pm$ 0.13 <sup>B</sup>     | 1.37 $\pm$ 0.29 <sup>C</sup>      | 1.04 $\pm$ 0.17 <sup>D</sup>      |
| <b>Miscellaneous aldehydes</b>              |       |                                  |                                  |                                   |                                   |

|                                       |   |                             |                             |                               |                               |
|---------------------------------------|---|-----------------------------|-----------------------------|-------------------------------|-------------------------------|
| Acetaldehyde<br>(µg/L)                | 1 | 1038.00±130.21 <sup>A</sup> | 1021.00±217.96 <sup>A</sup> | 1559.00±288.50 <sup>B</sup>   | 1831.00±324.46 <sup>B</sup>   |
|                                       | 2 | 497.10±172.01 <sup>A</sup>  | 1033.40±149.09 <sup>B</sup> | 1291.00±203.81 <sup>B</sup>   | 1834.60±178.28 <sup>C</sup>   |
|                                       | 3 | 980.30±205.20 <sup>A</sup>  | 1466.00±296.96 <sup>B</sup> | 1935.00±384.82 <sup>C</sup>   | 1855.60±161.12 <sup>B,C</sup> |
|                                       | 4 | 823.30±138.20 <sup>A</sup>  | 1593.10±149.98 <sup>B</sup> | 1692.00±410.32 <sup>B,C</sup> | 2059.30±262.29 <sup>C</sup>   |
|                                       | 5 | 1385.90±188.02 <sup>A</sup> | 1425.00±241.95 <sup>A</sup> | 2381.00±271.89 <sup>B</sup>   | 2445.60±231.59 <sup>B</sup>   |
| <b>Furanic aldehydes</b>              |   |                             |                             |                               |                               |
| 5-<br>hydroxymethylfurfural<br>(mg/L) | 1 | 3.09±0.08                   | 2.12±0.09                   | 3.65±0.09                     | 4.05±0.01                     |
|                                       | 2 | 3.40±0.05                   | 2.24±0.03                   | 3.87±0.04                     | 4.28±0.03                     |
|                                       | 3 | 3.61±0.09                   | 2.56±0.13                   | 4.21±0.13                     | 4.72±0.04                     |
|                                       | 4 | 3.38±0.20                   | 2.43±0.03                   | 4.11±0.07                     | 4.57±0.06                     |
|                                       | 5 | 3.67±0.10                   | 2.48±0.02                   | 4.00±0.08                     | 4.62±0.05                     |
| Furfural<br>(mg/L)                    | 1 | nd                          | nd                          | nd                            | nd                            |
|                                       | 2 | nd                          | nd                          | nd                            | nd                            |
|                                       | 3 | nd                          | nd                          | nd                            | nd                            |
|                                       | 4 | nd                          | nd                          | nd                            | nd                            |
|                                       | 5 | nd                          | nd                          | nd                            | nd                            |

nd - not detected; nq - not quantified
